# Supplementary material for: Lanthanide-doped lead-free double perovskite La2MgTiO6 as ultra-bright multicolour LEDs and novel self-calibrating partition optical thermometer
Source: Royal Society of Chemistry journal article supplement (doi:10.1039/d3qi00529a), 2023-01-01
Supplement: d3qi00529a1.pdf [file d3qi00529a1.pdf]

Lanthanide doped lead-free double perovskite  $\text{La}_2\text{MgTiO}_6$   
as ultra-bright multicolour LEDs and novel self-  
calibration partition optical thermometer

Keming Zhu<sup>a</sup>, Hanyu Xu<sup>a</sup>, Zhiying Wang<sup>a</sup>, Zuoling Fu<sup>a\*</sup>

<sup>a</sup>Coherent Light and Atomic and Molecular Spectroscopy Laboratory,  
Key Laboratory of physics and Technology for Advanced Batteries,  
College of Physics, Jilin University, Changchun 130012, China.

\*Corresponding author.

E-mail address: [zlfu@jlu.edu.cn](mailto:zlfu@jlu.edu.cn) (Z. L. Fu)

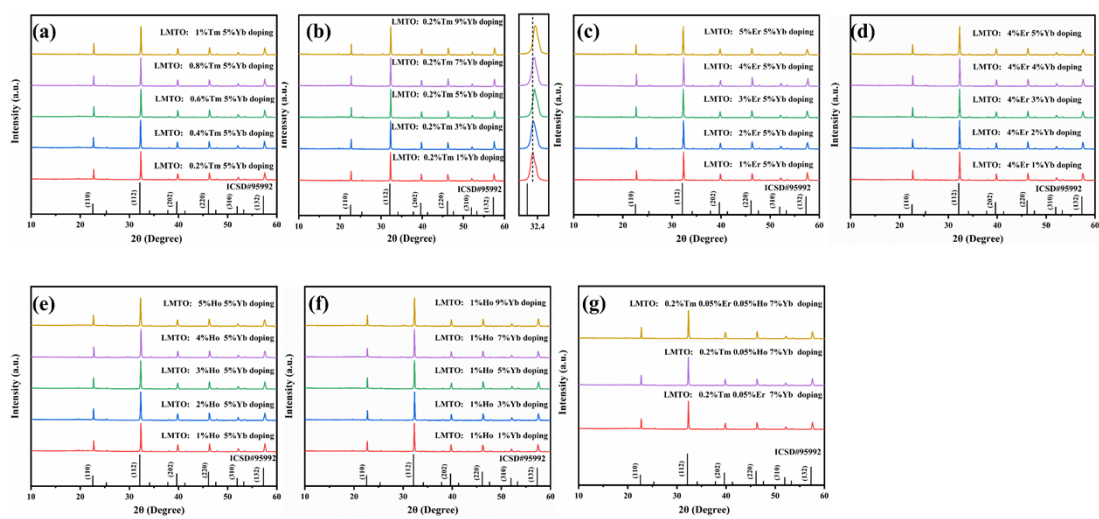

**Fig. S1** XRD patterns of (a-b) Tm-Yb; (c-d) Er-Yb; (e-f) Ho-Yb; (g) Ho/Er/Tm-Yb doped LMTO phosphors.

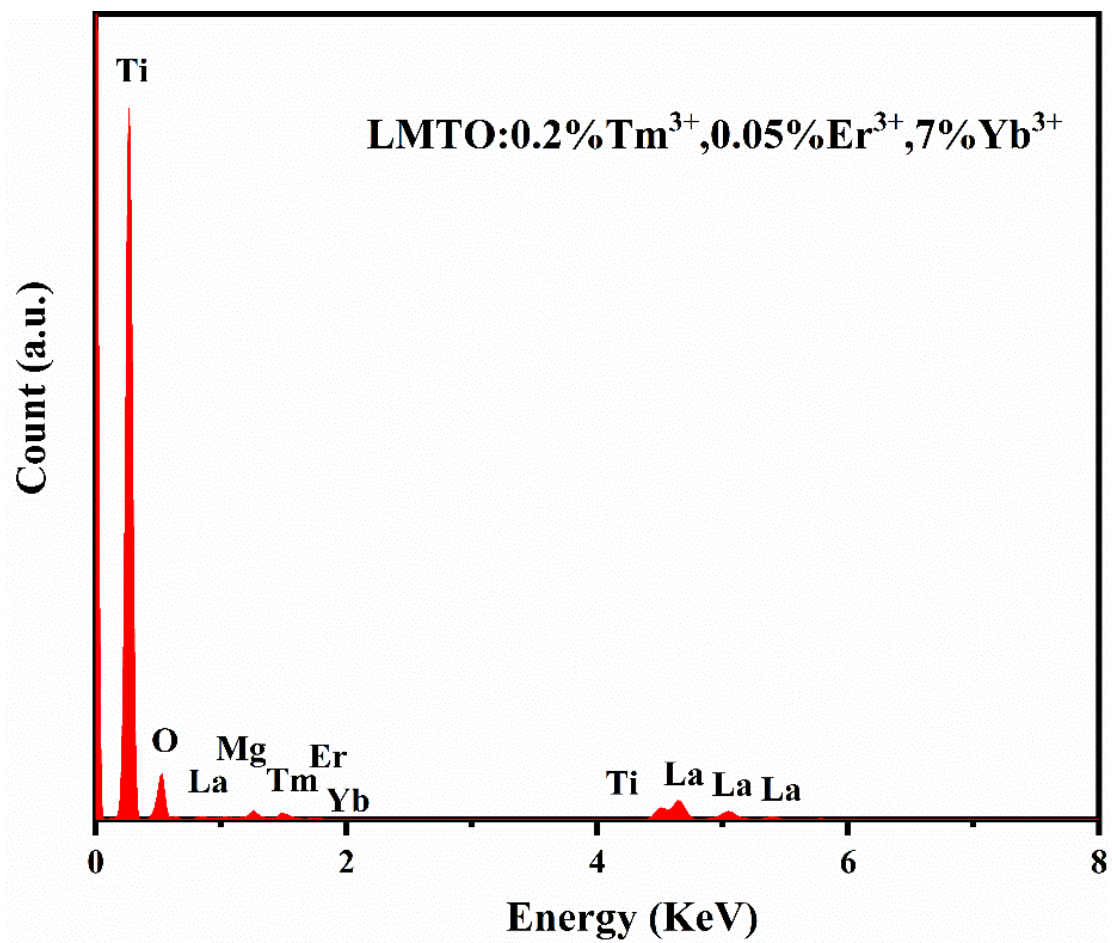

Fig. S2 EDS spectrum of LMTO: 0.2%Tm<sup>3+</sup>, 0.05%Er<sup>3+</sup>, 7%Yb<sup>3+</sup> phosphor.

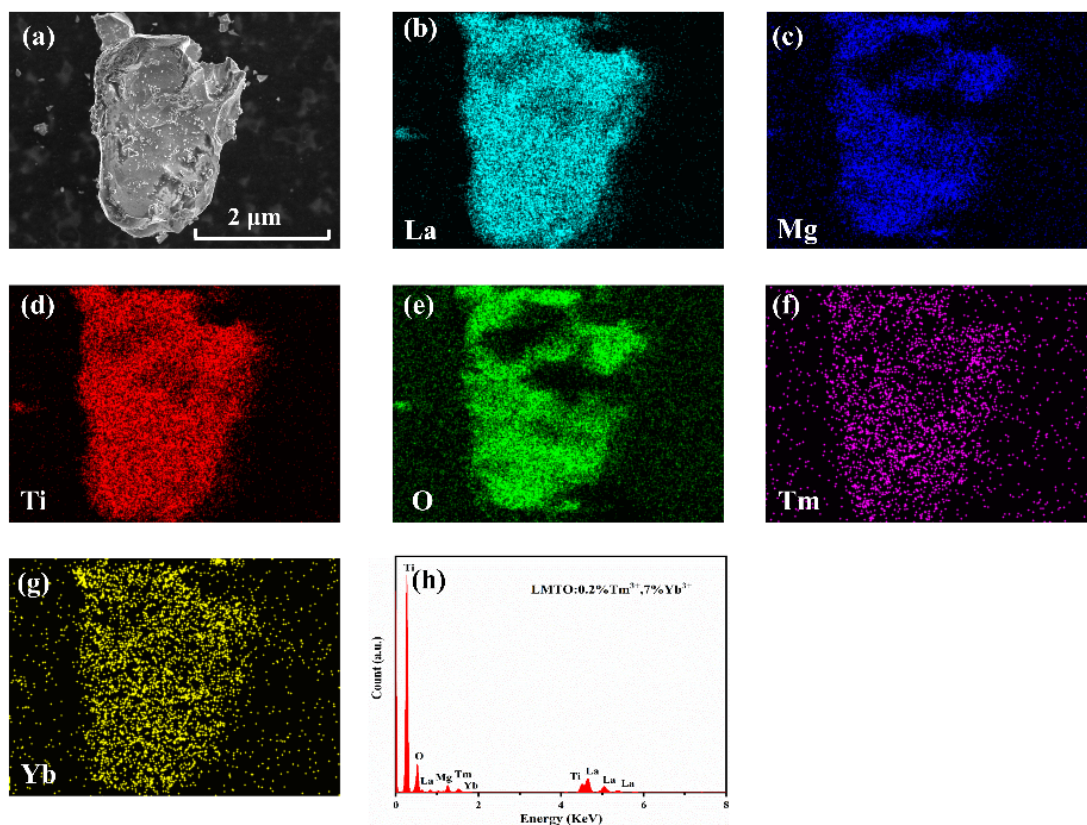

**Fig. S3** (a) FE-SEM image and (b-g) elemental mapping images of the LMTO: 0.2%Tm<sup>3+</sup>, 7%Yb<sup>3+</sup> phosphor. (h) EDS spectrum of LMTO: 0.2%Tm<sup>3+</sup>, 7%Yb<sup>3+</sup> phosphor.

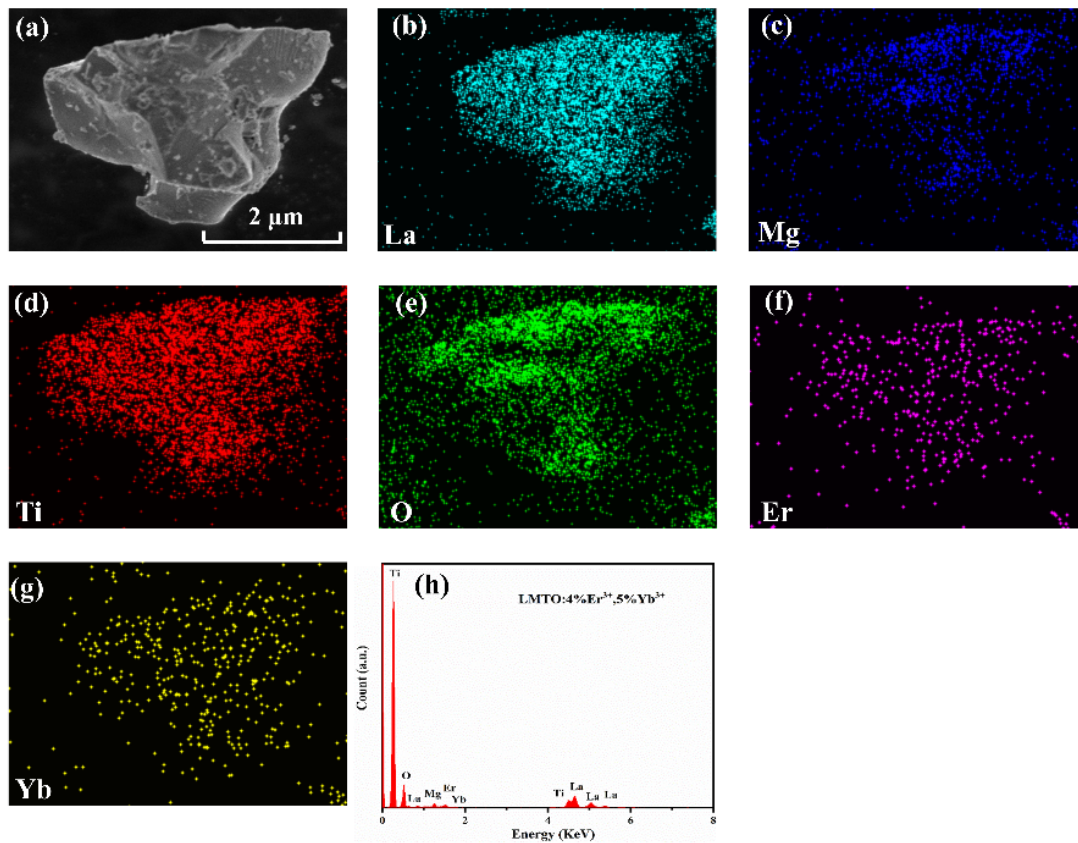

**Fig. S4** (a) FE-SEM image and (b-g) elemental mapping images of the LMTO: 4%Er<sup>3+</sup>, 5%Yb<sup>3+</sup> phosphor. (h) EDS spectrum of LMTO: 4%Er<sup>3+</sup>, 5%Yb<sup>3+</sup> phosphor.

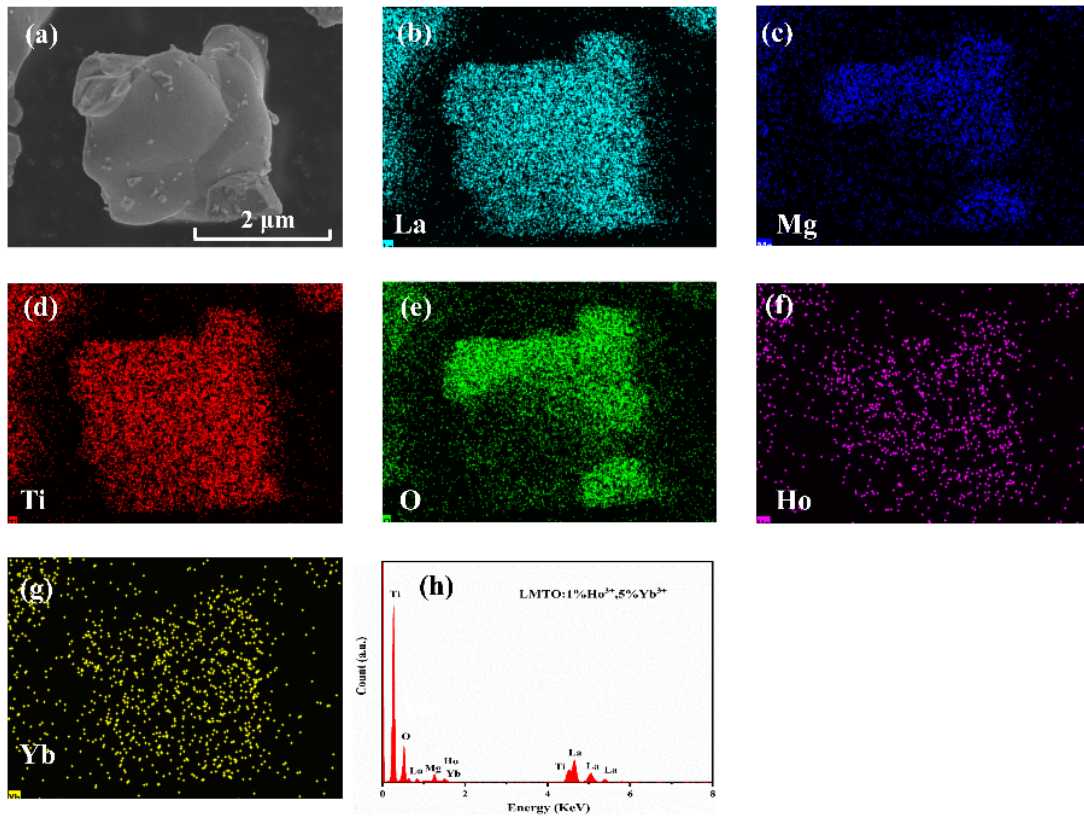

**Fig. S5** (a) FE-SEM image and (b-g) elemental mapping images of the LMTO: 1%Ho<sup>3+</sup>, 5%Yb<sup>3+</sup> phosphor. (h) EDS spectrum of LMTO: 1%Ho<sup>3+</sup>, 5%Yb<sup>3+</sup> phosphor.



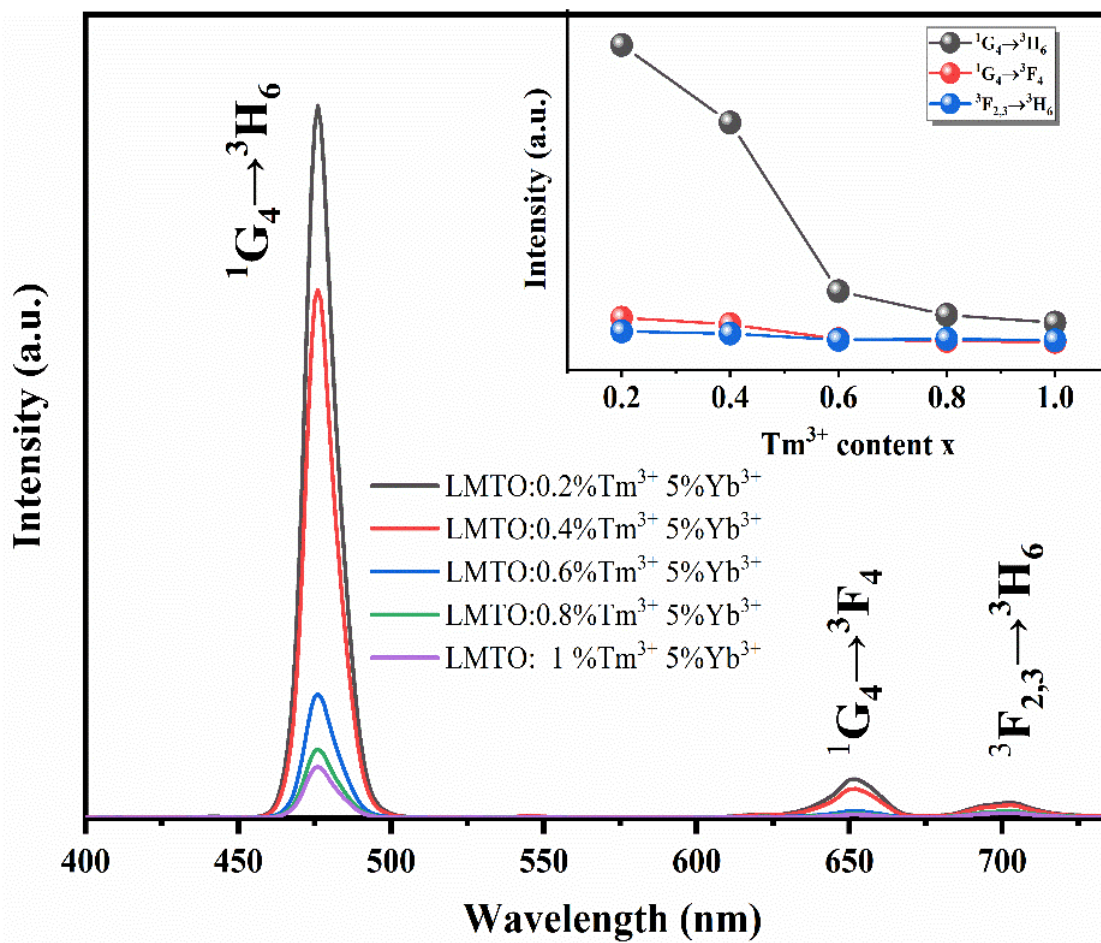

**Fig. S6** UC emission spectra of LMTO: x%Tm<sup>3+</sup>, 5Yb<sup>3+</sup> phosphors. Inset: Emission intensity as a function of the Yb<sup>3+</sup> contents.  $\lambda_{ex}$ = 980 nm.

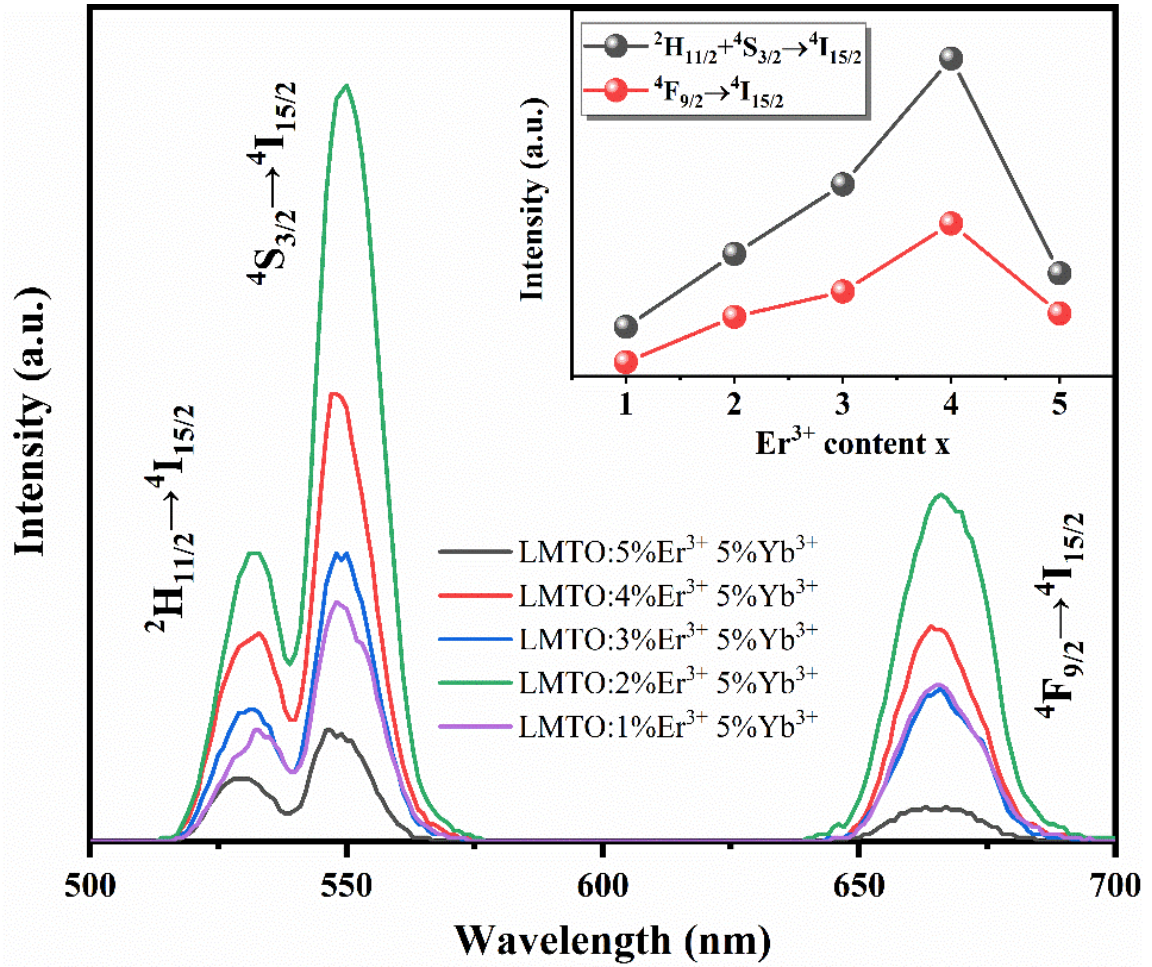

**Fig. S7** UC emission spectra of LMTO: x%Er<sup>3+</sup>, 5%Yb<sup>3+</sup> phosphors. Inset: Emission intensity as a function of the Yb<sup>3+</sup> contents.  $\lambda_{ex}$ = 980 nm.



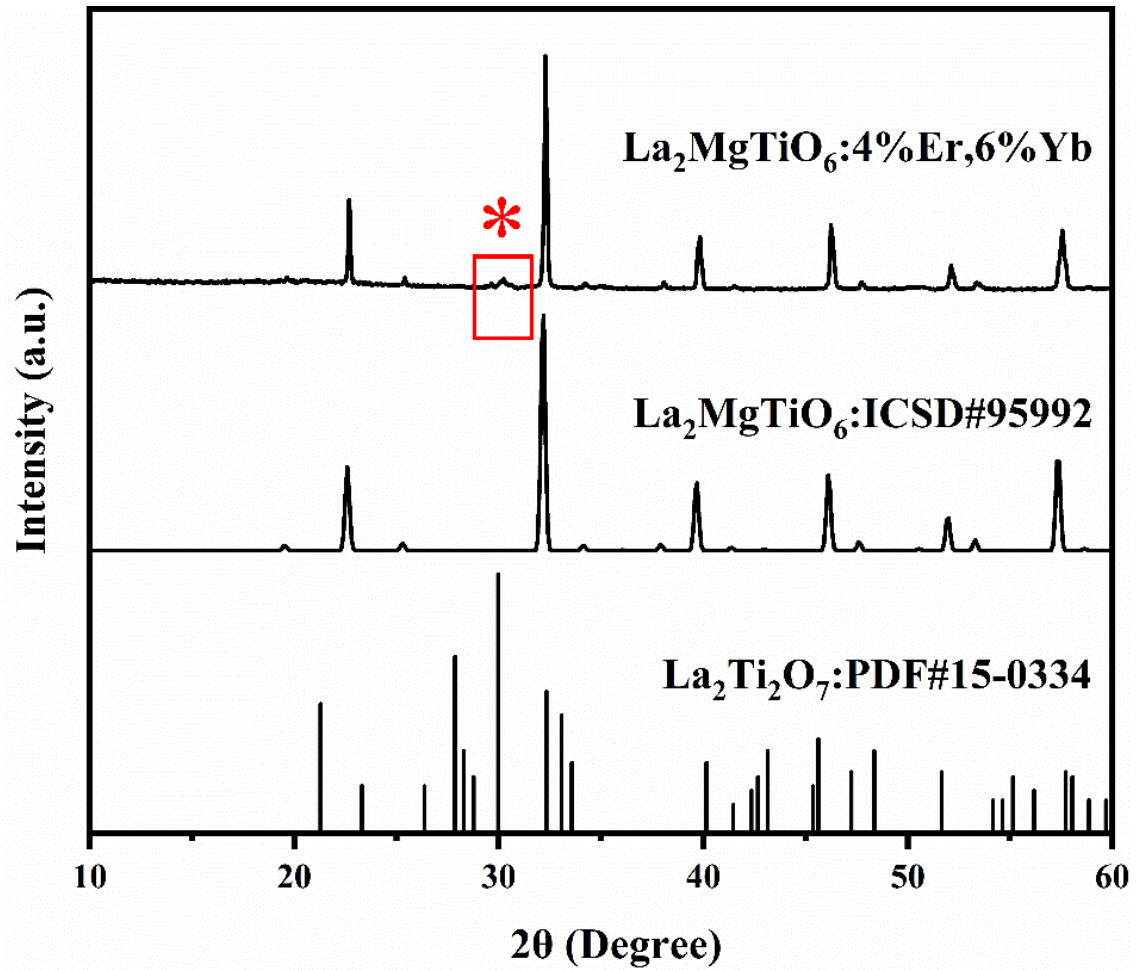

Fig. S8 XRD pattern of LMTO:4%Er<sup>3+</sup>, 6%Yb<sup>3+</sup> phosphor.

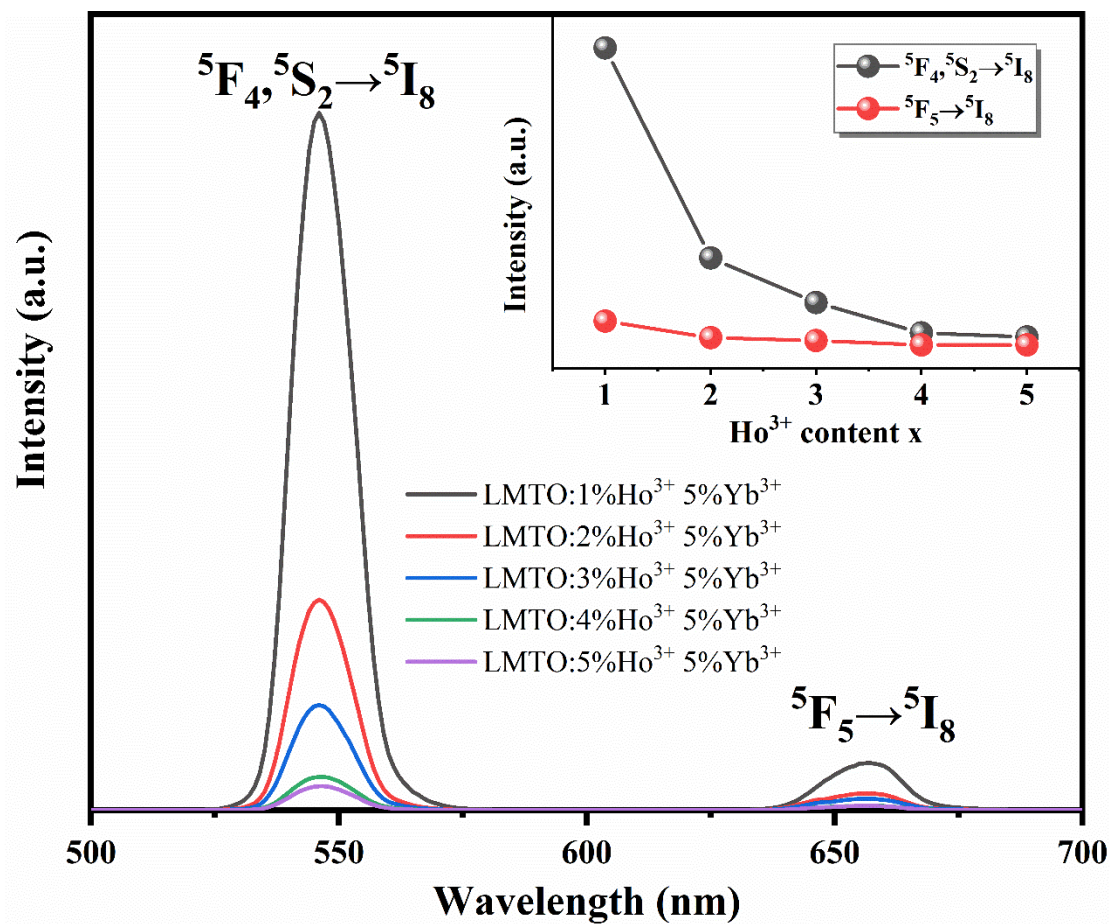

Fig. S9 UC emission spectra of LMTO: x%Ho<sup>3+</sup>, 5%Yb<sup>3+</sup> phosphors. Inset: Emission intensity as a function of the Yb<sup>3+</sup> contents.  $\lambda_{\text{ex}} = 980$  nm.

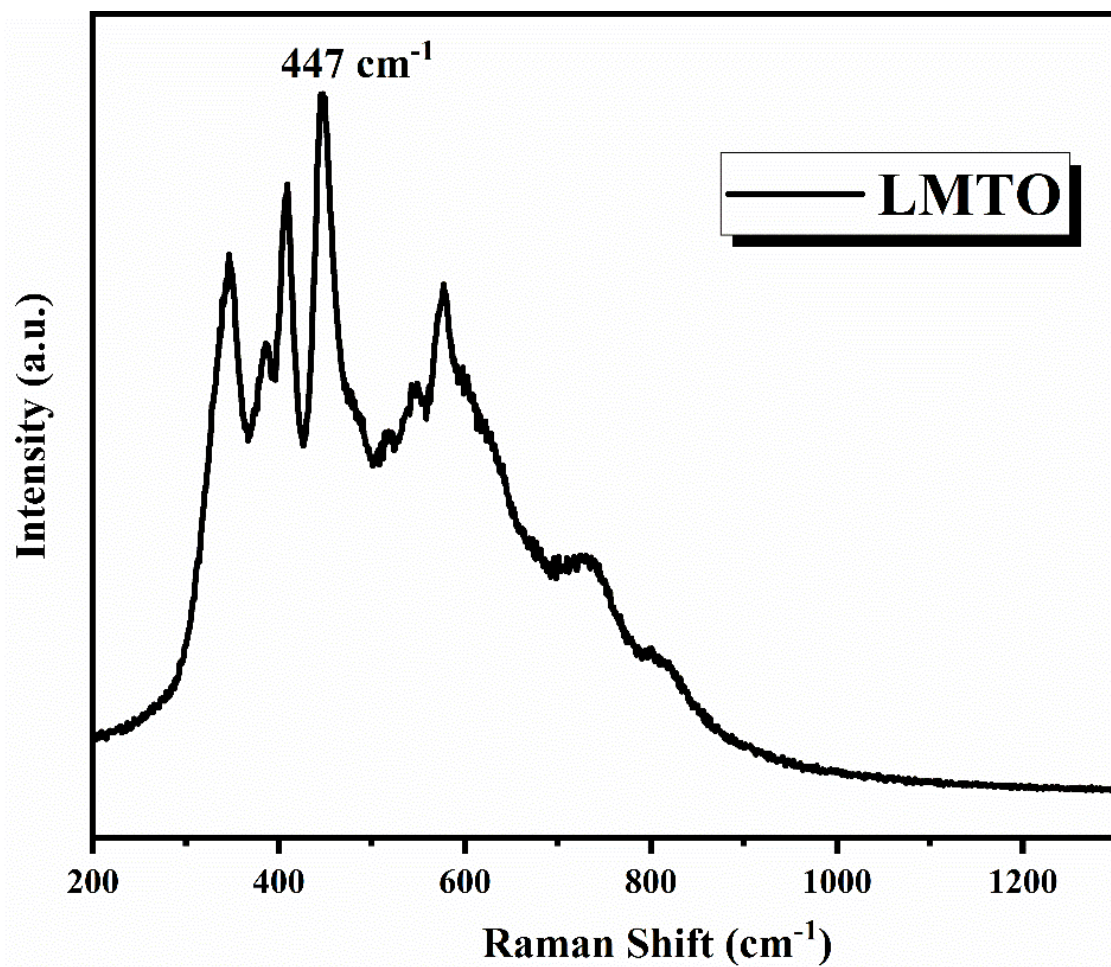

Fig. S10 Raman spectrum of the LMTO host.

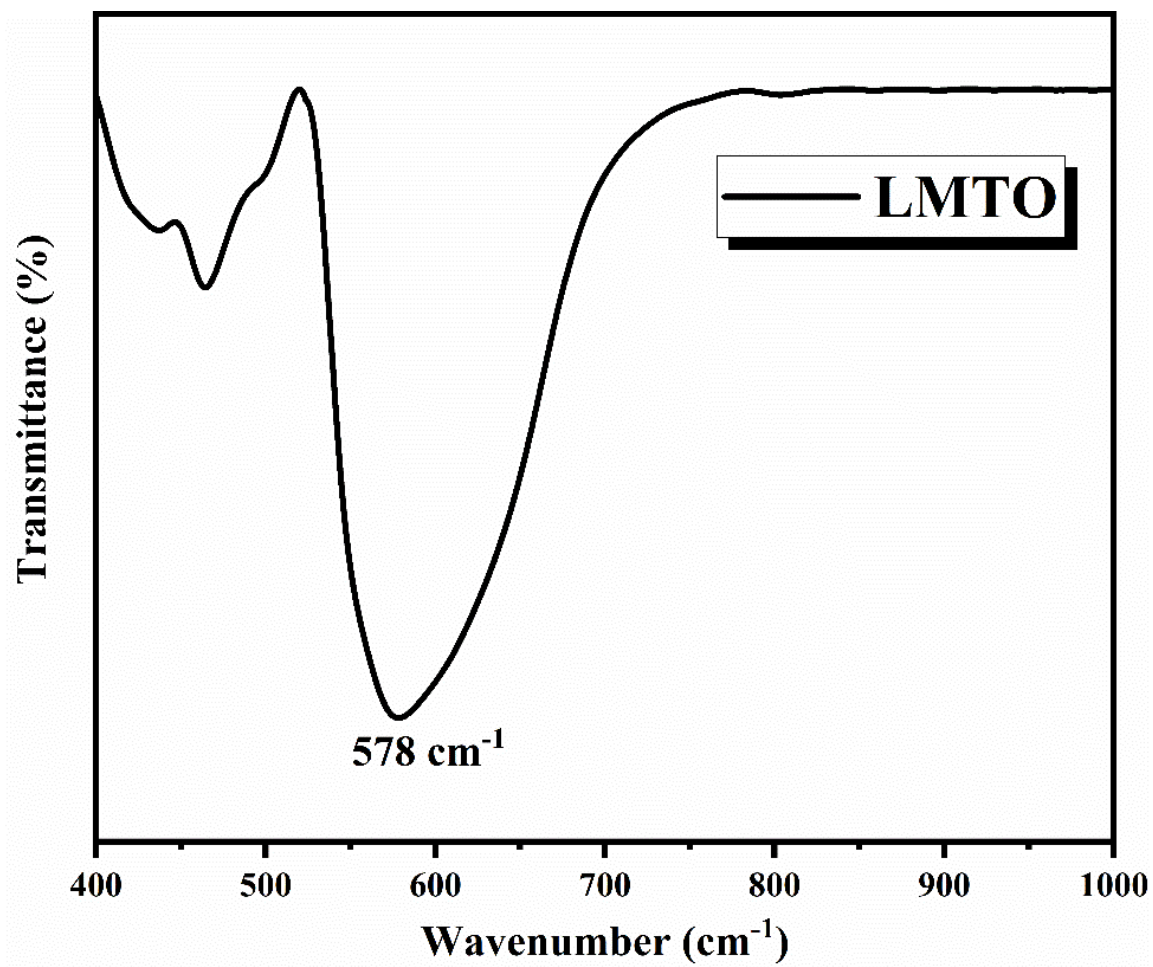

Fig. S11 FT-IR spectrum of the LMTO host.

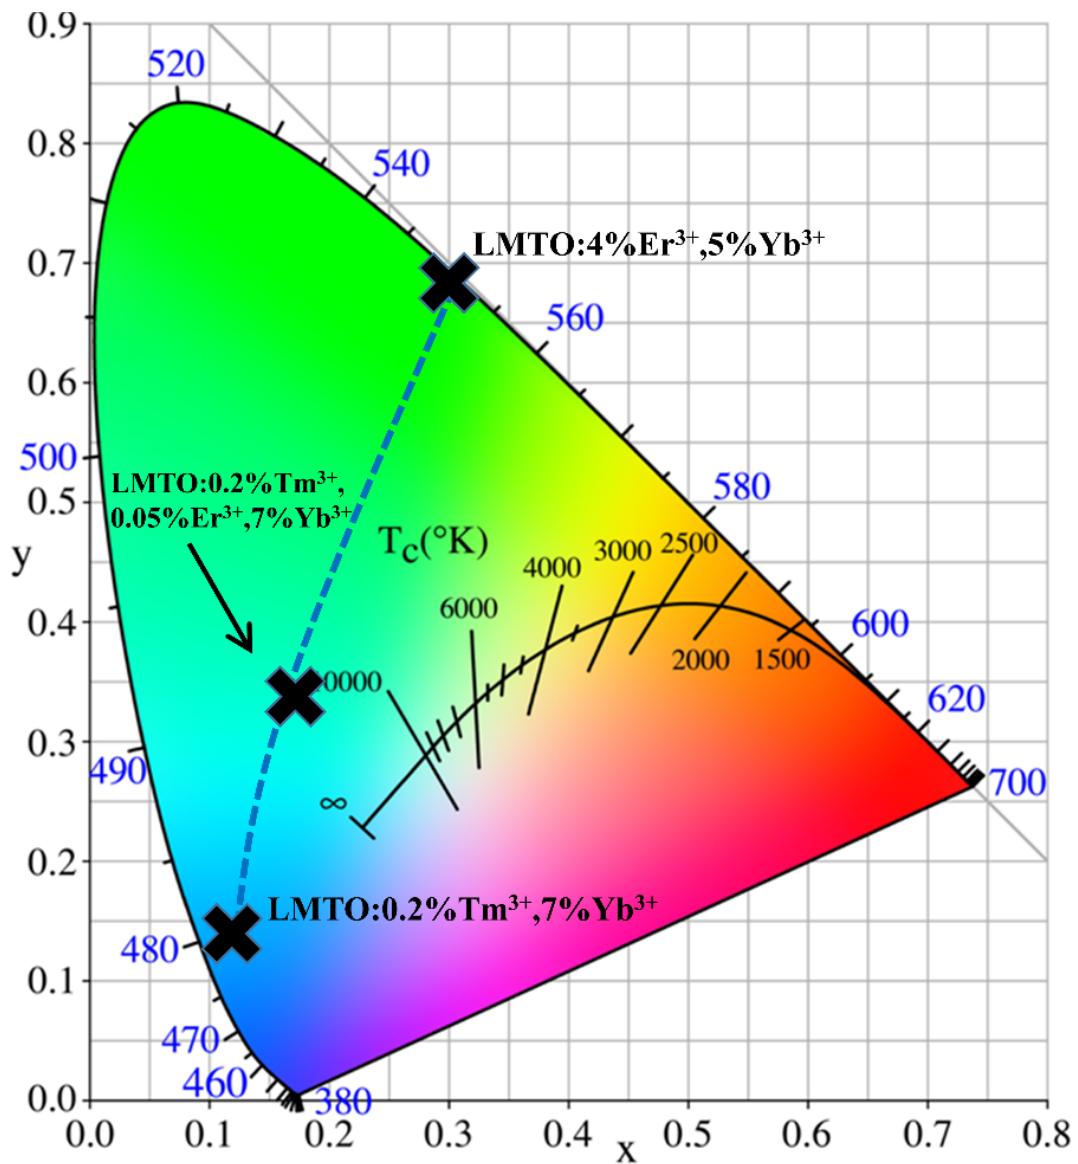

**Fig. S12** CIE chromatic coordinates of LMTO:0.2%Tm<sup>3+</sup>, 7%Yb<sup>3+</sup>, LMTO:4%Er<sup>3+</sup>, 5%Yb<sup>3+</sup> and LMTO:0.2%Tm<sup>3+</sup>, 0.05Er<sup>3+</sup>, 7%Yb<sup>3+</sup> phosphors.

**Table S1.** The color purity of LMTO: 1%Ho<sup>3+</sup>,5%Yb<sup>3+</sup>, LMTO: 4%Er<sup>3+</sup>,5%Yb<sup>3+</sup> and LMTO: 0.2%Tm<sup>3+</sup>,7%Yb<sup>3+</sup> phosphors.

| <b>Compound</b>                               | <b>(x, y)</b> | <b>(x<sub>i</sub>, y<sub>i</sub>)</b> | <b>(x<sub>d</sub>, y<sub>d</sub>)</b> | <b>Color purity (%)</b> |
|-----------------------------------------------|---------------|---------------------------------------|---------------------------------------|-------------------------|
| LMTO: 1%Ho <sup>3+</sup> ,5%Yb <sup>3+</sup>  | (0.276,0.713) |                                       | (0.264,0.725)                         | 91.8%                   |
| LMTO: 4%Er <sup>3+</sup> ,5%Yb <sup>3+</sup>  | (0.314,0.675) | (0.3101,0.3162)                       | (0.288,0.700)                         | 93.4%                   |
| LMTO:0.2%Tm <sup>3+</sup> ,7%Yb <sup>3+</sup> | (0.118,0.139) |                                       | (0.095,0.131)                         | 92.2%                   |



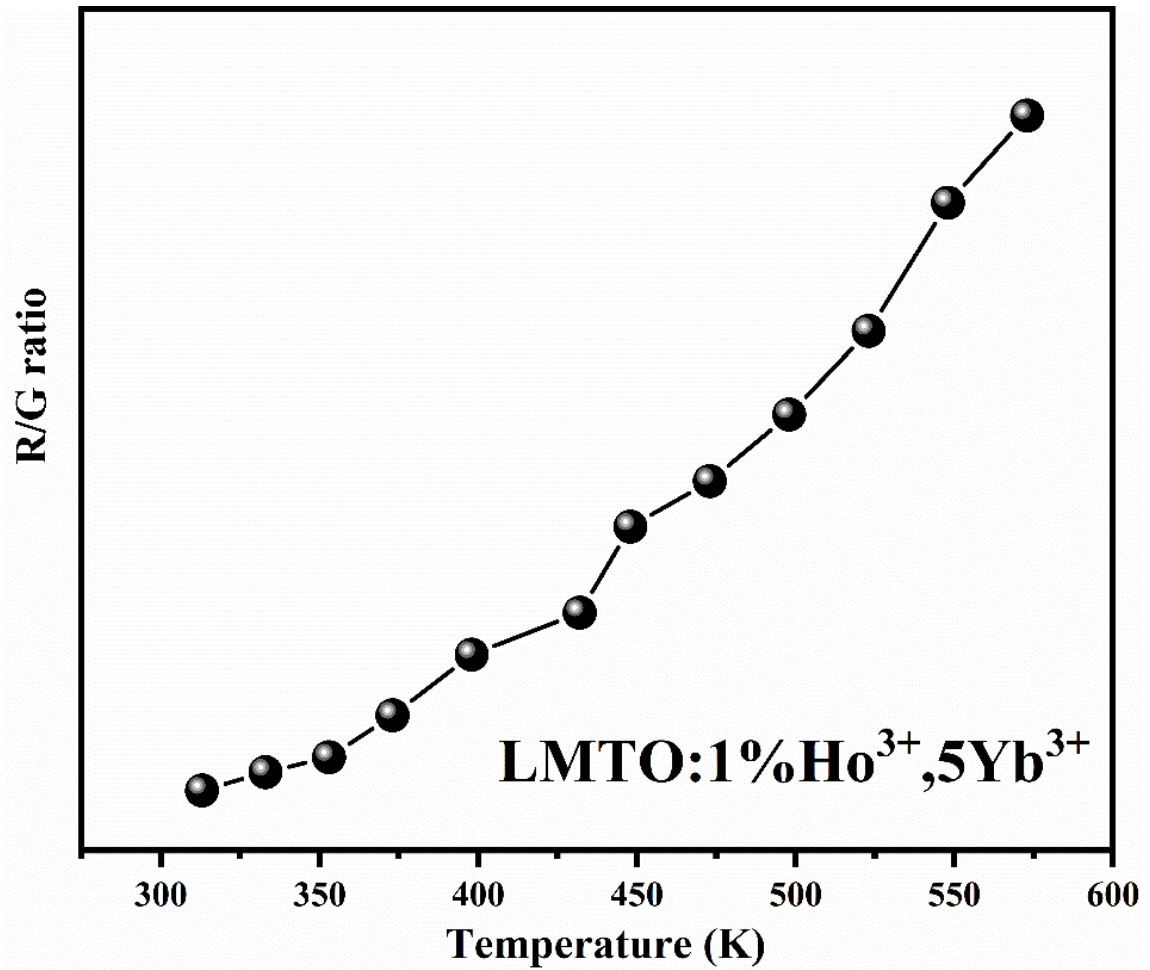

Fig. S13 The curve of red-green ratio varying with temperature.

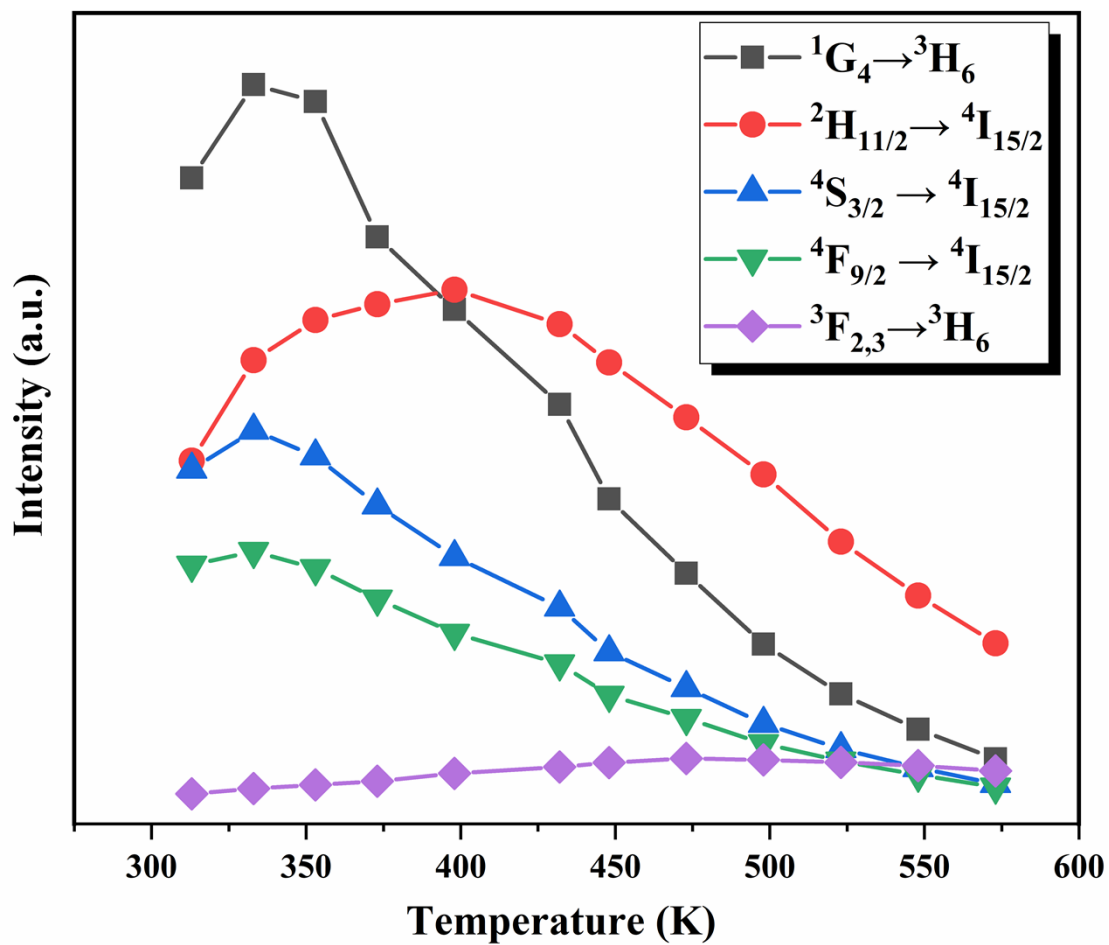

**Fig. S14** The PL emission intensity of  $\text{La}_2\text{MgTiO}_6: 0.2\%\text{Tm}^{3+}, 0.05\%\text{Er}^{3+}, 7\%\text{Yb}^{3+}$  phosphor versus various temperatures.

**Table S2.** Sensing sensitivities of Ln<sup>3+</sup>-activated luminescent thermometers.

| Compounds                                                                                                | Transitions                                                                                                                                           | Range (K) | S <sub>a</sub> (% K <sup>-1</sup> ) | S <sub>r</sub> (% K <sup>-1</sup> ) | Refs      |
|----------------------------------------------------------------------------------------------------------|-------------------------------------------------------------------------------------------------------------------------------------------------------|-----------|-------------------------------------|-------------------------------------|-----------|
| Na <sub>2</sub> YMg <sub>2</sub> (VO <sub>4</sub> ) <sub>3</sub> :<br>Er <sup>3+</sup> /Yb <sup>3+</sup> | <sup>2</sup> H <sub>11/2</sub> , <sup>4</sup> S <sub>3/2</sub> → <sup>4</sup> I <sub>15/2</sub>                                                       | 303-573   | 0.77                                | 1.104                               | 1         |
| Ba <sub>2</sub> SrLu <sub>4</sub> O <sub>9</sub> :Er <sup>3+</sup> /Yb <sup>3+</sup>                     | <sup>2</sup> H <sub>11/2</sub> , <sup>4</sup> S <sub>3/2</sub> → <sup>4</sup> I <sub>15/2</sub>                                                       | 303-573   | 0.46                                | 0.99                                | 2         |
| Na <sub>3</sub> Gd(VO <sub>4</sub> ) <sub>2</sub> :<br>Er <sup>3+</sup> /Yb <sup>3+</sup>                | <sup>2</sup> H <sub>11/2</sub> , <sup>4</sup> S <sub>3/2</sub> → <sup>4</sup> I <sub>15/2</sub>                                                       | 291-578   | 0.48                                | 0.83                                | 3         |
| La <sub>2</sub> Ti <sub>2</sub> O <sub>7</sub> :<br>Ho <sup>3+</sup> /Yb <sup>3+</sup>                   | <sup>5</sup> F <sub>5</sub> / <sup>5</sup> F <sub>4</sub> , <sup>5</sup> S <sub>2</sub> → <sup>5</sup> I <sub>8</sub>                                 | 293-473   | 0.32                                | 1.41                                | 4         |
| TeO <sub>2</sub> -ZnO-BaO:<br>Ho <sup>3+</sup> /Yb <sup>3+</sup>                                         | <sup>5</sup> F <sub>5</sub> / <sup>5</sup> F <sub>4</sub> , <sup>5</sup> S <sub>2</sub> → <sup>5</sup> I <sub>8</sub>                                 | 303-503   | 0.49                                | 0.41                                | 5         |
| NaLuF <sub>4</sub> : Ho <sup>3+</sup> /Yb <sup>3+</sup>                                                  | <sup>5</sup> F <sub>1</sub> , <sup>5</sup> G <sub>6</sub> / <sup>5</sup> F <sub>2,3</sub> , <sup>3</sup> K <sub>8</sub> → <sup>5</sup> I <sub>8</sub> | 390-780   | 0.14                                | 0.83                                | 6         |
| YOF: Tm <sup>3+</sup> /Yb <sup>3+</sup>                                                                  | <sup>3</sup> H <sub>4(2)</sub> , <sup>3</sup> H <sub>4(2)</sub> → <sup>3</sup> H <sub>6</sub>                                                         | 190-300   | 0.27                                | 0.1207                              | 7         |
| Sr <sub>2</sub> GdF <sub>7</sub> :<br>Tm <sup>3+</sup> /Yb <sup>3+</sup>                                 | <sup>3</sup> F <sub>3</sub> → <sup>3</sup> H <sub>6</sub> / <sup>1</sup> G <sub>4</sub> → <sup>3</sup> F <sub>4</sub>                                 | 293-563   | 3.9                                 | 1.97                                | 8         |
| Bi <sub>2</sub> SiO <sub>5</sub> :Tm <sup>3+</sup> ,<br>Yb <sup>3+</sup> @SiO <sub>2</sub>               | <sup>1</sup> G <sub>4</sub> → <sup>3</sup> F <sub>4</sub> / <sup>3</sup> F <sub>2,3</sub> → <sup>3</sup> H <sub>6</sub>                               | 280-400   | 1.68                                | 1.95                                | 9         |
| LMTO:0.2%Tm <sup>3+</sup><br>+, 7%Yb <sup>3+</sup>                                                       | LIR 1 <sub>Tm</sub><br>LIR 2 <sub>Tm</sub>                                                                                                            |           | 4.94<br>3.32                        | 1.92<br>1.63                        |           |
| LMTO:4%Er <sup>3+</sup> ,<br>5%Yb <sup>3+</sup>                                                          | LIR 3 <sub>Er</sub>                                                                                                                                   |           | 0.68                                | 1.13                                |           |
| LMTO:1%Ho <sup>3+</sup> ,<br>5%Yb <sup>3+</sup>                                                          | LIR 4 <sub>Ho</sub>                                                                                                                                   | 313-573   | 0.18                                | 0.58                                | This work |
| LMTO:0.2%Tm <sup>3+</sup> ,<br>0.05%Er <sup>3+</sup> , 7%Yb <sup>3+</sup>                                | LIR 2 <sub>Tm</sub><br>LIR 3 <sub>Er</sub><br>LIR 5 <sub>Er+Tm</sub>                                                                                  |           | 0.81<br>1.47<br>1.06                | 1.36<br>1.09<br>1.21                |           |

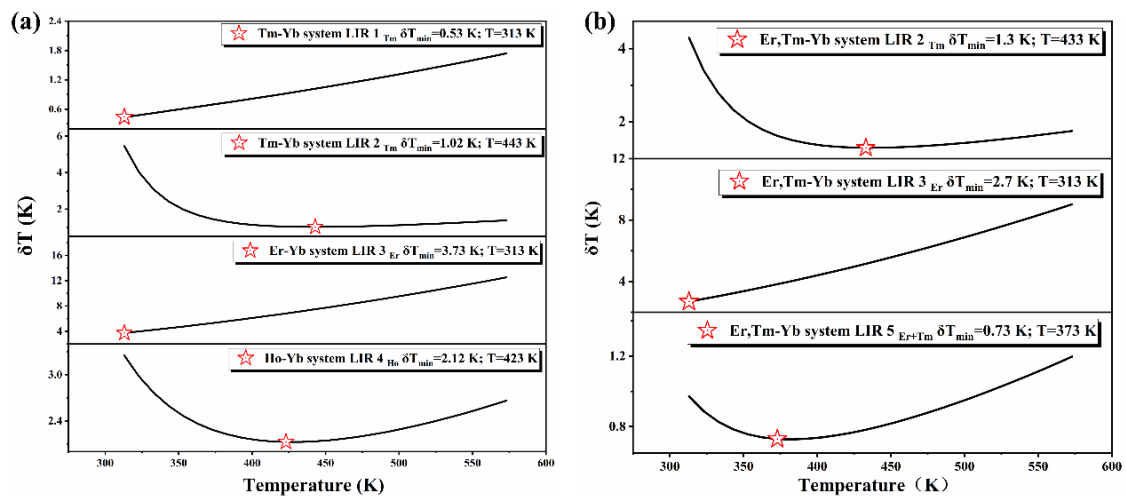

**Fig. S15** Temperature uncertainty  $\delta T$  of Mode I-IV.

**Table S3.** The  $\delta T_{\min}$  and Repeatability (R) values of four temperature measurement modes.

| Compounds                                                                 | LIR                    | $\delta T_{\min}$ | Repeatability (R) |
|---------------------------------------------------------------------------|------------------------|-------------------|-------------------|
| LMTO:0.2%Tm <sup>3+</sup> , 7%Yb <sup>3+</sup>                            | LIR 1 <sub>Tm</sub>    | 0.53              | 96.1%             |
|                                                                           | LIR 2 <sub>Tm</sub>    | 1.02              | 91.4%             |
| LMTO:4%Er <sup>3+</sup> , 5%Yb <sup>3+</sup>                              | LIR 3 <sub>Er</sub>    | 3.73              | 98.5%             |
| LMTO:1%Ho <sup>3+</sup> , 5%Yb <sup>3+</sup>                              | LIR 4 <sub>Ho</sub>    | 2.12              | 92.1%             |
| LMTO:0.2%Tm <sup>3+</sup> ,<br>0.05%Er <sup>3+</sup> , 7%Yb <sup>3+</sup> | LIR 2 <sub>Tm</sub>    | 1.3               | 95.6%             |
|                                                                           | LIR 3 <sub>Er</sub>    | 2.7               | 96.3%             |
|                                                                           | LIR 5 <sub>Er+Tm</sub> | 0.73              | 97%               |

## References

1. Y. Tong, W. Zhang, R. Wei, L. Chen, H. Guo, Na<sub>2</sub>YMg<sub>2</sub>(VO<sub>4</sub>)<sub>3</sub>:Er<sup>3+</sup>,Yb<sup>3+</sup> phosphors: Up-conversion and optical thermometry, *Ceram. Int.*, 2021, **47**, 2600-2606.
2. J. Hu, X. Zhang, H. Zheng, F. Lu, X. Peng, R. Wei, F. Hu, H. Guo, Improved photoluminescence and multi-mode optical thermometry of Er<sup>3+</sup>/Yb<sup>3+</sup> co-doped (Ba,Sr)<sub>3</sub>Lu<sub>4</sub>O<sub>9</sub> phosphors, *Ceram. Int.*, 2022, **48**, 3051-3058.
3. K. Saidi, M. Dammak, K. Soler-Carracedo, I.R. Martín, Optical thermometry based on upconversion emissions in Na<sub>3</sub>Gd (VO<sub>4</sub>)<sub>2</sub>: Yb<sup>3+</sup>-Er<sup>3+</sup>/Ho<sup>3+</sup> micro crystals, *J. Alloys Compd.*, 2022, **891**, 161993.
4. Y. Zhao, Z. Su, Y. Huang, Y. Liu, S. Xu, G. Bai, Dual-functional lanthanide ions doped lanthanum titanate microcrystals for simultaneous temperature detection and photothermal conversion, *J. Lumin.*, 2021, **239**, 118335.
5. A. Doğan, M. Erdem, K. Esmer, G. Eryürek, Upconversion luminescence and temperature sensing characteristics of Ho<sup>3+</sup>/Yb<sup>3+</sup> co-doped tellurite glasses, *J. Non-Cryst. Solids*, 2021, **571**, 121055.
6. S. Zhou, S. Jiang, X. Wei, Y. Chen, C. Duan, M. Yin, Optical thermometry based on upconversion luminescence in Yb<sup>3+</sup>/Ho<sup>3+</sup> co-doped NaLuF<sub>4</sub>, *J. Alloys Compd.*, 2014, **588**, 654-657.
7. H. Lu, J. Yang, D. Huang, Q. Zou, M. Yang, X. Zhang, Y. Wang, H. Zhu, Ultranarrow NIR bandwidth and temperature sensing of YOF:Yb<sup>3+</sup>/Tm<sup>3+</sup> phosphor in low temperature range, *J. Lumin.*, 2019, **206**, 613-617.
8. W. Chen, J. Cao, F. Hu, R. Wei, L. Chen, H. Guo, Sr<sub>2</sub>GdF<sub>7</sub>:Tm<sup>3+</sup>/Yb<sup>3+</sup> glass ceramic: A highly sensitive optical thermometer based on FIR technique, *J. Alloys Compd.*, 2018, **735**, 2544-2550.
9. E. Casagrande, M. Back, D. Cristofori, J. Ueda, S. Tanabe, S. Palazzolo, F. Rizzolio, V. Canzonieri, E. Trave, P. Riello, Upconversion-mediated Boltzmann thermometry in double-layered Bi<sub>2</sub>SiO<sub>5</sub>:Yb<sup>3+</sup>, Tm<sup>3+</sup>@SiO<sub>2</sub> hollow nanoparticles, *J. Mater. Chem. C*, 2020, **8**, 7828-7836.
